# Supplementary material
Source: PubMed Central journal article supplement (PMC7392969)
Supplement: 40801_2020_191_MOESM1_ESM.pdf [file 40801_2020_191_MOESM1_ESM.pdf]

## Supplementary Material

Clinical Experience with Telavancin for the Treatment of Patients with Bacteremia and Endocarditis: Real-world Results from the Telavancin Observational Use Registry (TOUR™)

Drugs – Real World Outcomes

Reilly J, Jacobs MA, Friedman B, Cleveland KO, Lombardi DA, Castaneda-Ruiz B

Joseph.Reilly@atlanticare.org

Atlanticare Regional Medical Center

### Supplementary Table 1.

*Disposition and outcomes of patients without available end of telavancin therapy assessment*

No clinical response assessment at end of telavancin therapy (EOTT) was recorded for 19/151 (12.6%) patients (**Supplementary Table 1**). Five of these patients (26.3%) died within 28 days after starting telavancin, compared with 14/132 (10.6%) patients with available EOTT assessment (**Supplementary Table 1**). Relative to patients with available EOTT assessment, patients not assessed at EOTT were numerically less often recorded as stopping telavancin treatment due to clinical cure (6/19 [31.6%] vs 78/132 [59.1%]) or clinical failure (0/19 [0% vs 8/132 [6.1%]) and more often recorded as discontinuing telavancin due to adverse events (5/19 [26.3%] vs 17/132 [12.9%]) or loss to follow-up (4/19 [21.1%] vs 2/132 [1.5%]; **Supplementary Table 1**). Early assessment was performed in 10/19 (52.6%) patients without EOTT assessment, at which time all 10 patients (100.0%) showed signs of clinical improvement; a similar proportion of patients with available early and EOTT assessments showed signs of clinical improvement at early assessment (103/117 [88.0%]; **Supplementary Table 1**). Posttreatment assessments were available for only 4/19 (21.1%)

patients with no available EOTT assessment; of these, 1/4 (25.0%) patients was cured, 1/4 (25.0%) patients failed treatment, and 2/4 (50.0%) patients had indeterminate outcomes at posttreatment assessment (**Supplementary Table 1**). Among patients with both EOTT and posttreatment assessments, 68/99 (68.7%) were cured, 15/99 (15.2%) failed treatment, and 16/99 (16.2%) had an indeterminate outcome at posttreatment assessment (**Supplementary Table 1**).

**Supplementary Table 1.** Comparison of patients with and without available outcome at end of telavancin treatment

|                                                         | <b>Available outcome at EOTT</b> |                        |
|---------------------------------------------------------|----------------------------------|------------------------|
|                                                         | <b>Yes<br/>(n = 132)</b>         | <b>No<br/>(n = 19)</b> |
| <b>Reason for telavancin discontinuation</b>            |                                  |                        |
| Clinical cure                                           | 78 (59.1)                        | 6 (31.6)               |
| Other                                                   | 27 (20.5)                        | 4 (21.1)               |
| Adverse event                                           | 17 (12.9)                        | 5 (26.3)               |
| Clinical failure                                        | 8 (6.1)                          | 0                      |
| Lost to follow-up                                       | 2 (1.5)                          | 4 (21.1)               |
| <b>Death &lt;28 days after first dose of telavancin</b> | 14 (10.6)                        | 5 (26.3)               |
| <b>Outcome of early assessment</b>                      |                                  |                        |
| Available assessment                                    | 117 (88.6)                       | 10 (52.6)              |
| Showed signs of clinical improvement*                   | 103 (88.0)                       | 10 (100.0)             |
| No improvement, switched to alternative antibiotic*     | 5 (4.3)                          | 0                      |
| <b>Outcome of posttreatment assessment</b>              |                                  |                        |
| Available assessment                                    | 99 (75.0)                        | 4 (21.1)               |
| Cured*                                                  | 68 (68.7)                        | 1 (25.0)               |
| Failed treatment*                                       | 15 (15.2)                        | 1 (25.0)               |
| Indeterminate*                                          | 16 (16.2)                        | 2 (50.0)               |

All data represent n (%).

\*% of patients with available assessment.

EOTT, end of telavancin therapy.
